# Supplementary material for: Identification and Venom Characterization of Two Scorpions from the State of Chihuahua Mexico: Chihuahuanus coahuliae and Chihuahuanus crassimannus
Source: MDPI journal article supplement (doi:10.3390/toxins15070416), 2023-06-27
Supplement: s1 [file s1]

## Supplementary material

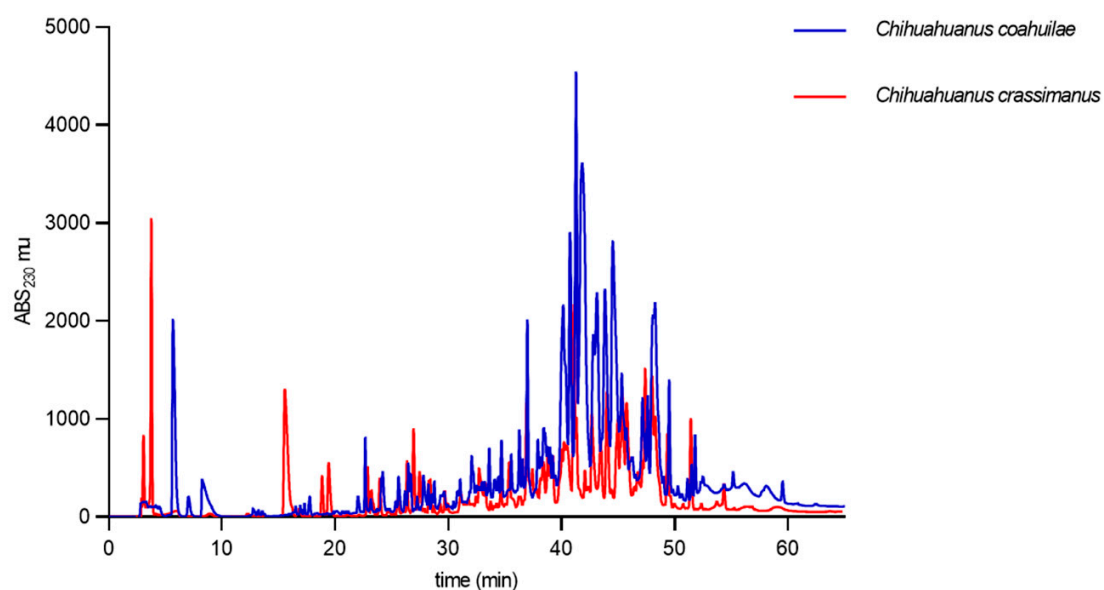

**Figure S1. Overlapping HPLC profiles of two scorpion venoms.** The venom of *Chihuahuanus coahuilae* and *Chihuahuanus crassimanus* scorpions were separated by RP-HPLC. The HPLC separation was performed using a C18 column in a gradient of 0 to 60%

**Table S1. Comparative view of HPLC obtained fraction, molecular weight and effects of two different scorpion venoms**

| <i>Ch. coahuilae</i> venom |                      |                     |              |                 | <i>Ch. crassimanus</i> venom |                      |                     |              |                 |                                      |
|----------------------------|----------------------|---------------------|--------------|-----------------|------------------------------|----------------------|---------------------|--------------|-----------------|--------------------------------------|
| Fraction                   | Retention time (min) | Molecular mass (Da) | Mouse (2 µg) | Cricket (10 µg) | Fraction                     | Retention time (min) | Molecular mass (Da) | Mouse (2 µg) | Cricket (10 µg) | Comments                             |
| 35                         | 36                   | 2,977.0<br>3,066.1  | -            | -               | 22                           | 37.5                 | 3,066.7             | -            | -               | KTx                                  |
| 39                         | 40.7                 | 8,302.3             | Dead         | -               | 26                           | 41.3                 | 8,302.6             | -            | -               | NaTx                                 |
| 43                         | 43.1                 | 6,559.1<br>6,736.1  | Dead         | Dead            | 29                           | 43.7                 | 6,709.4<br>6,747.2  | Dead         | Paralyzed       | Insect-Toxin / Contaminated fraction |
| 44                         | 43.6                 | 6,643.7<br>6,616.4  | -            | Paralyzed       | 30                           | 44.3                 | 6,643               | -            | Paralyzed       | Insect-Toxin / Contaminated fraction |

*Chihuahuanus coahuilae*

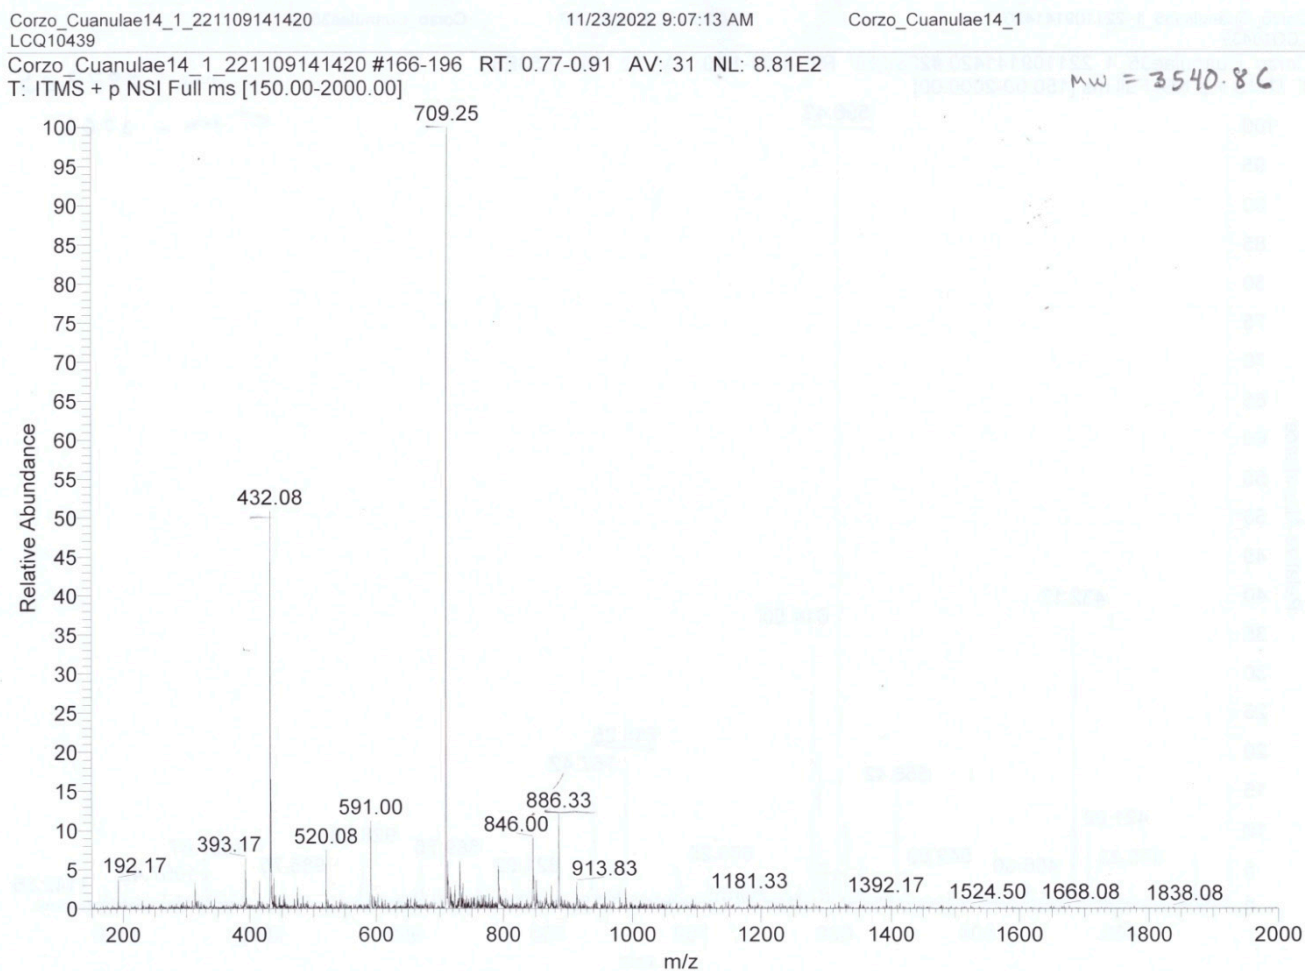

**Figure S2.** Mass spectrum fraction 14 *Chihuahuanus coahuilae*

Corzo\_Cuanulae39\_1\_221109141420 #207-217 RT: 0.96-1.00 AV: 11 NL: 2.06E3  
T: ITMS + p NSI Full ms [150.00-2000.00]

$m/z = 8302.31$

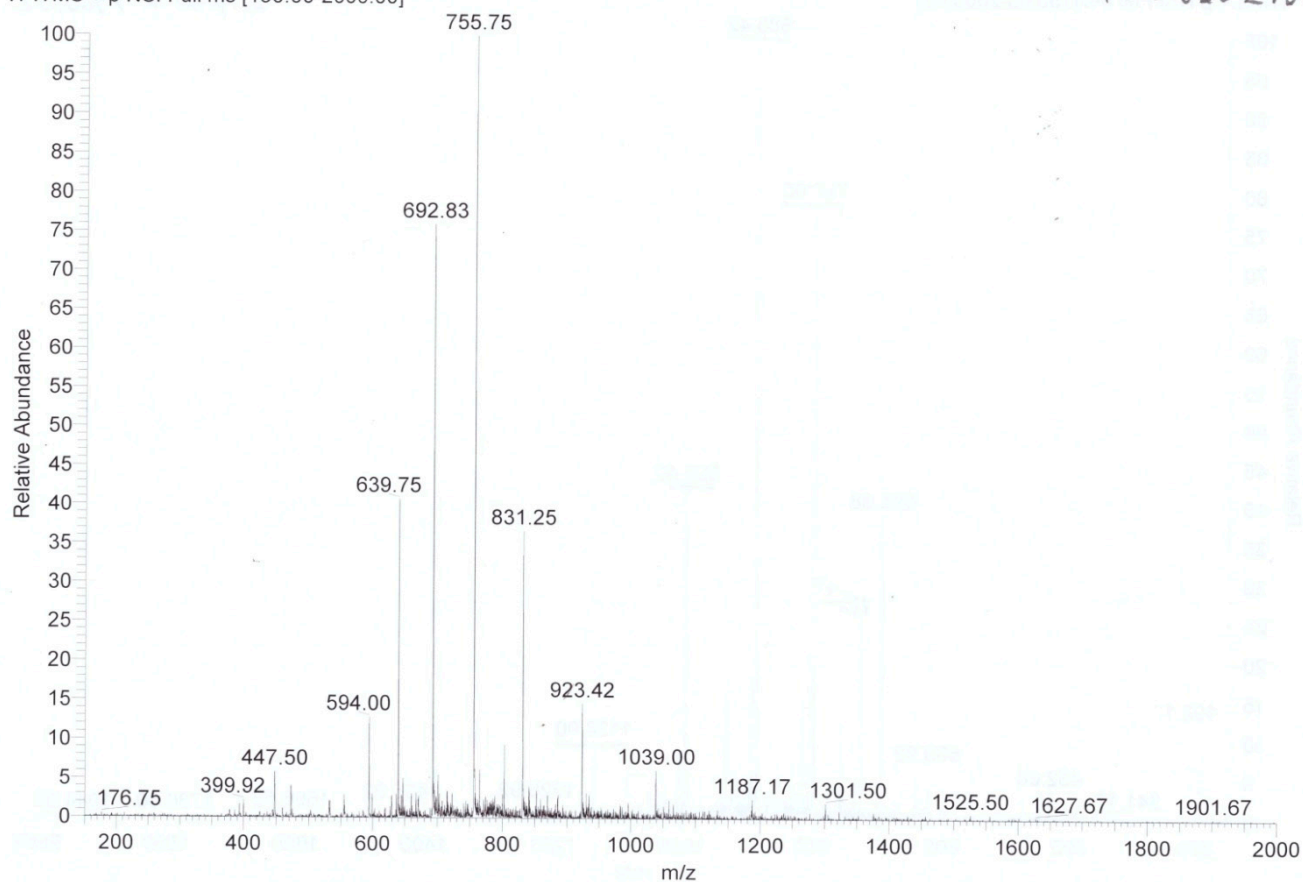

**Figure S3.** Mass spectrum fraction 39 *Chihuahuanus coahuilae*

Corzo\_Cuanulae43\_1\_221109141420  
LCQ10439

11/23/2022 9:46:14 AM

Corzo\_Cuanulae43\_1

1

Corzo\_Cuanulae43\_1\_221109141420 #255-319 RT: 1.16-1.46 AV: 65 NL: 5.47E2  
T: ITMS + p NSI Full ms [150.00-2000.00]

~ MW = 6559.05  
O MW = 6736.17

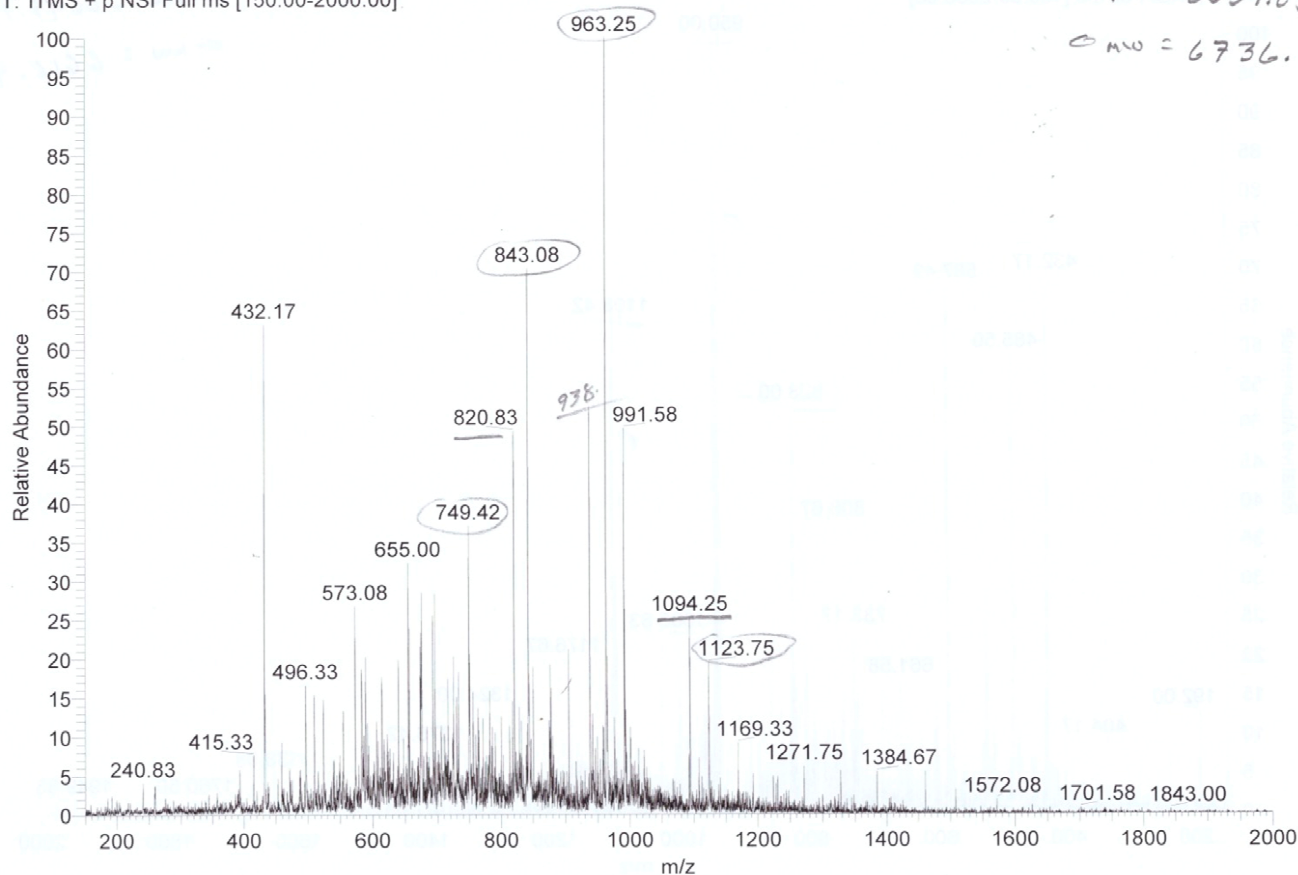

**Figure S4.** Mass spectrum fraction 43 *Chihuahuanus coahuilae*



Corzo\_Cuanulae44\_1\_221109141420  
LCQ10439

11/23/2022 10:00:54 AM

Corzo\_Cuanulae44\_1

Corzo\_Cuanulae44\_1\_221109141420 #191-209 RT: 0.88-0.96 AV: 19 NL: 1.25E2  
T: ITMS + p NSI Full ms [150.00-2000.00]

- MW = 6643.7  
= MW = 6616.49

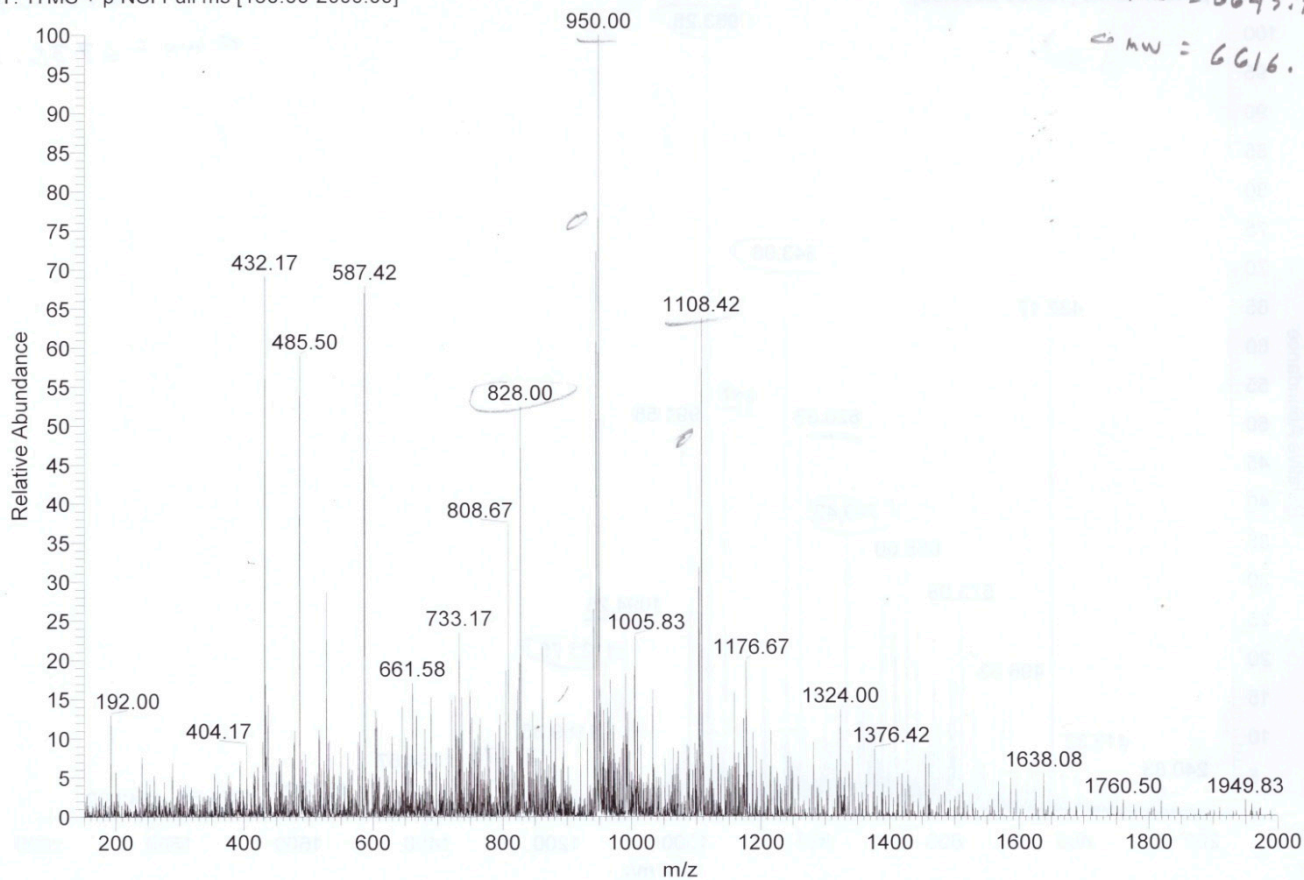

**Figure S5.** Mass spectrum fraction 44 *Chihuahuanus coahuilae*

Corzo\_Cuanulae45\_1\_221109141420 #174-191 RT: 0.80-0.88 AV: 18 NL: 4.95E4  
T: ITMS + p NSI Full ms [150.00-2000.00]

MW = 2103.97

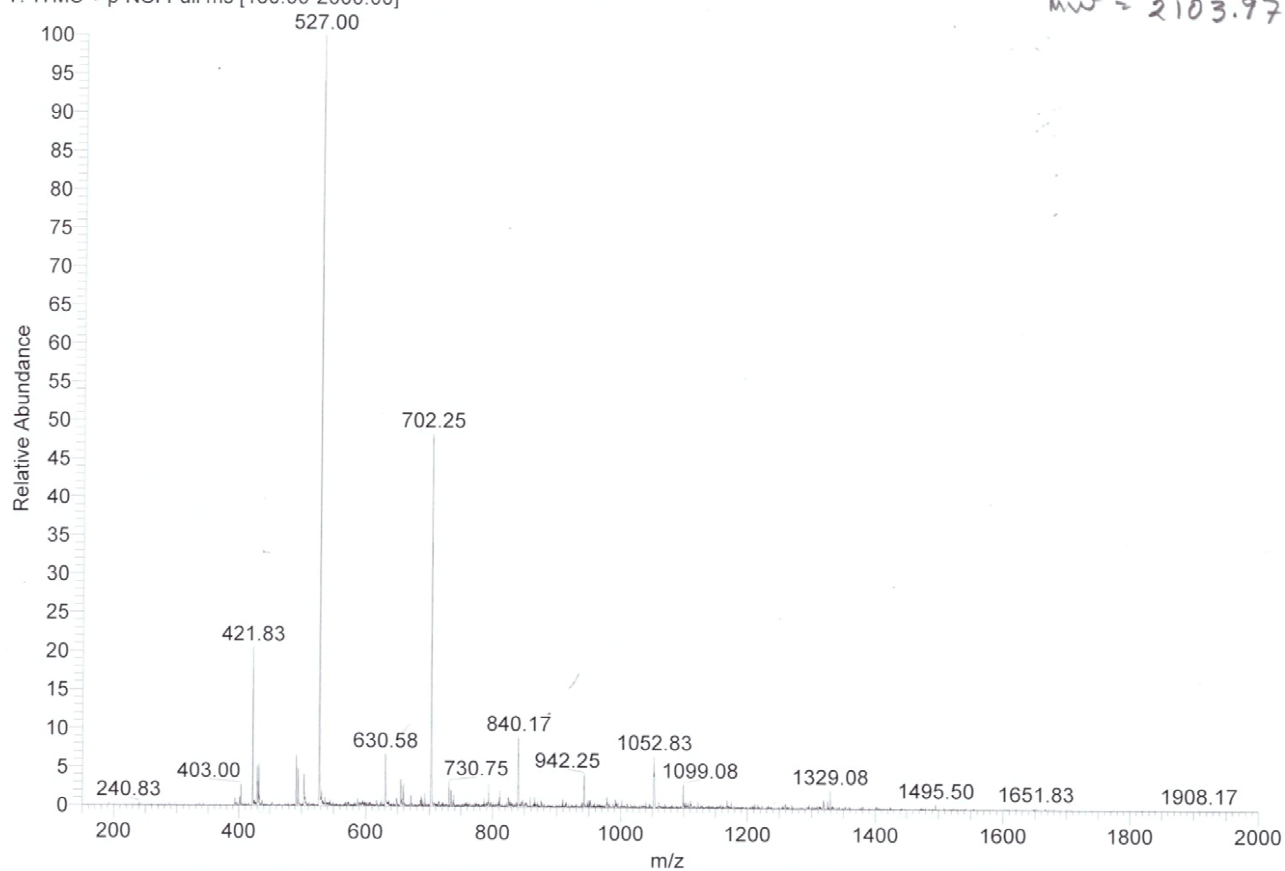

**Figure S6.** Mass spectrum fraction 45 *Chihuahuanus coahuilae*

Corzo\_Coonolae50\_1\_221109141420  
LCQ10439

11/25/2022 1:18:04 PM

Corzo\_Coonolae50\_1

Corzo\_Coonolae50\_1\_221109141420 #214-237 RT: 0.98-1.08 AV: 24 NL: 3.75E3  
T: ITMS + p NSI Full ms [150.00-2000.00]

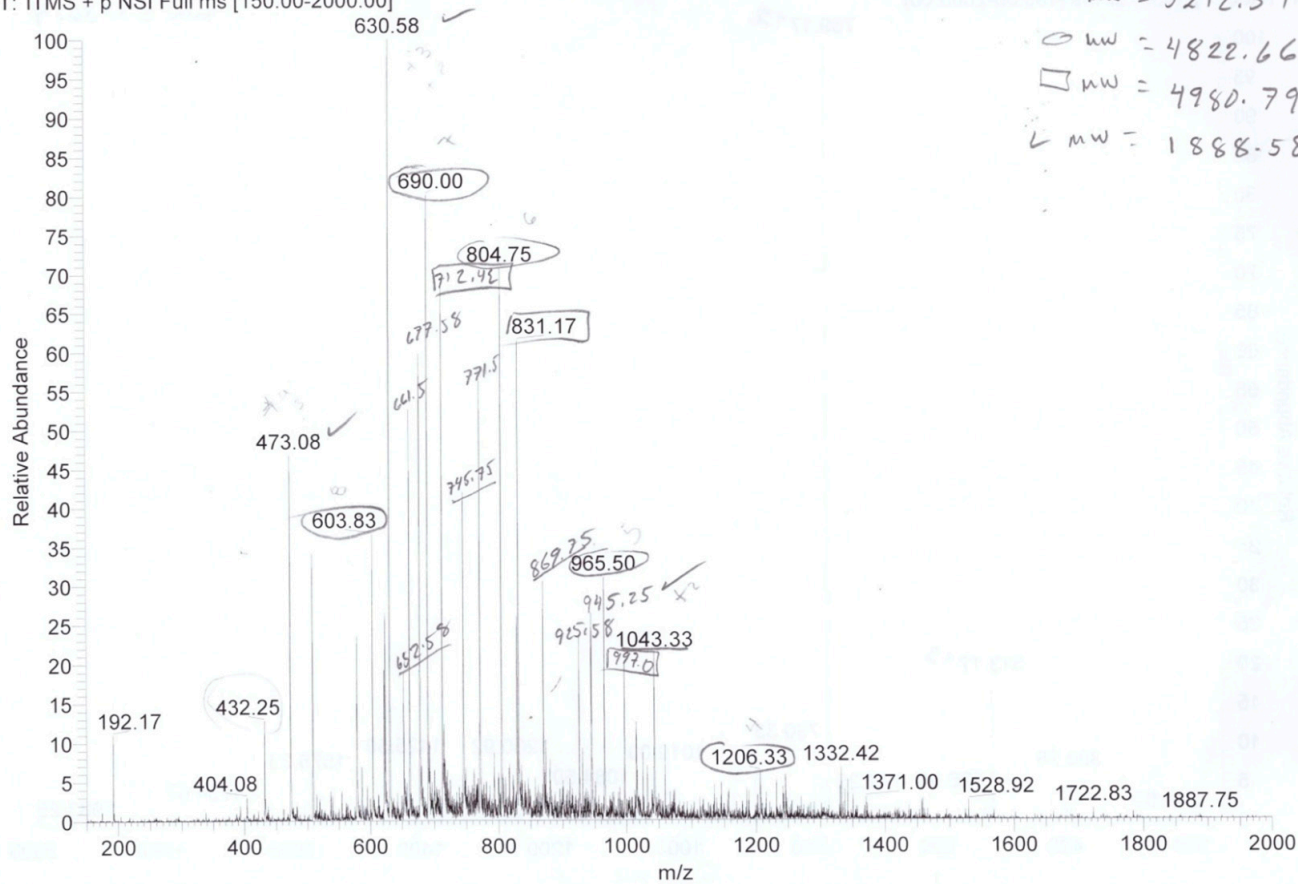

Figure S7. Mass spectrum fraction 50 *Chihuahuanus coahuilae*

Corzo\_Coonolae51\_1\_221109141420 #235-253 RT: 1.08-1.16 AV: 19 NL: 3.45E3  
T: ITMS + p NSI Full ms [150.00-2000.00]

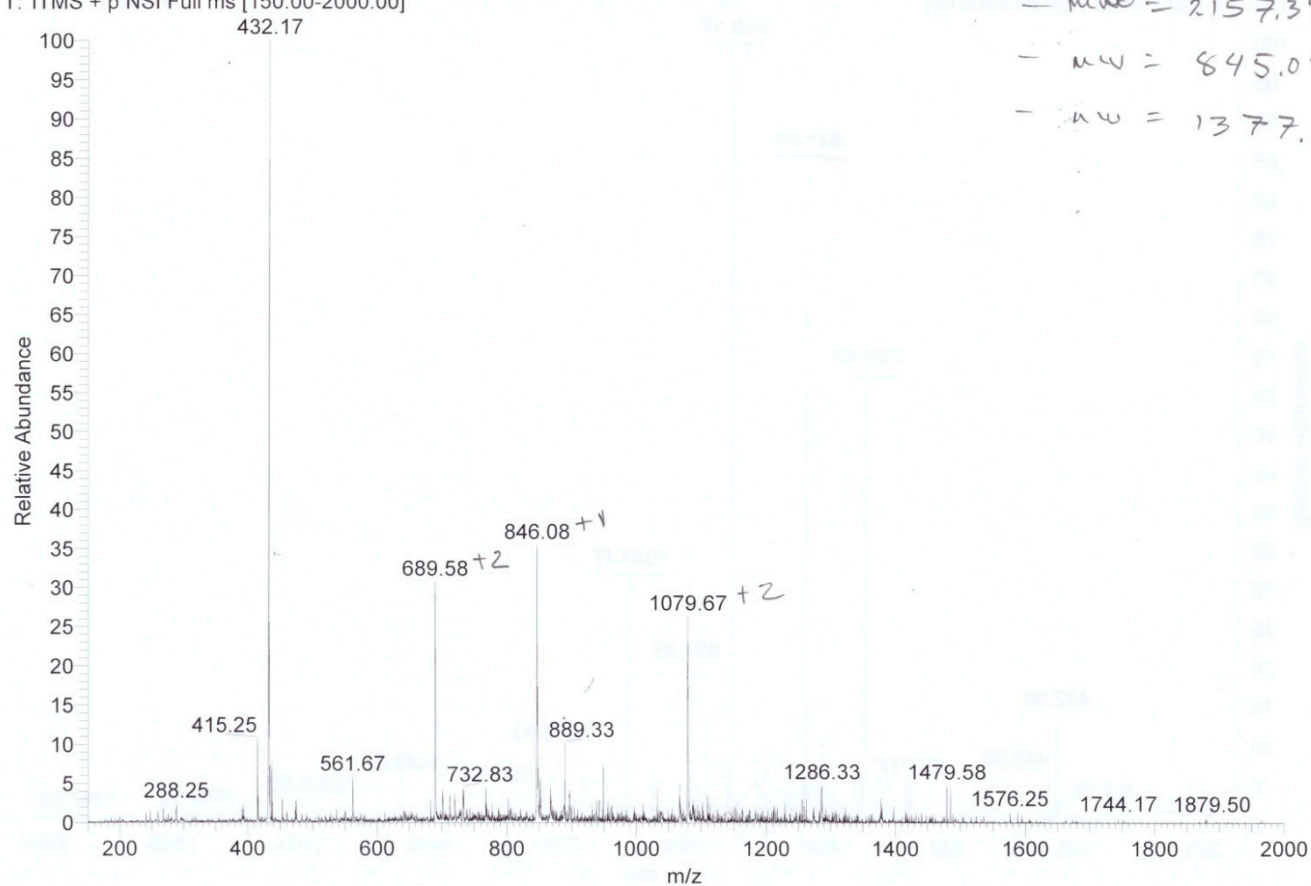

**Figure S8.** Mass spectrum fraction 51 *Chihuahuanus coahuilae*

Corzo\_Coonolae54\_1\_221129085353  
LCQ10439

11/29/2022 9:03:06 AM

Corzo\_Coonolae54\_1

Corzo\_Coonolae54\_1\_221129085353 #219-250 RT: 1.00-1.14 AV: 32 NL: 6.83E3  
T: ITMS + p NSI Full ms [150.00-2000.00]

MW = 1364.17

1.752 ug

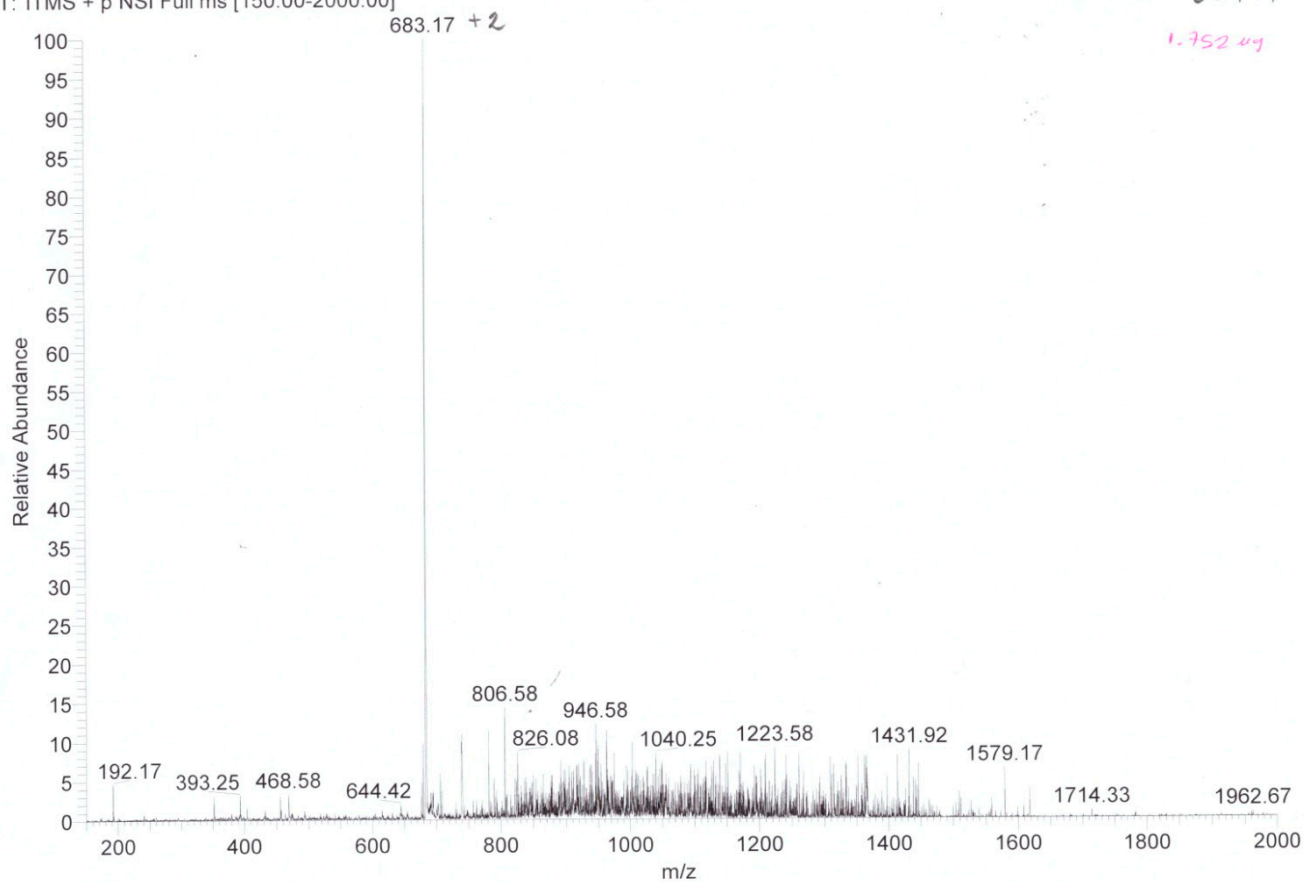

**Figure S9.** Mass spectrum fraction 54 *Chihuahuanus coahuilae*

Corzo\_Coonolae59\_1\_221109141420 #200-222 RT: 0.92-1.02 AV: 23 NL: 1.33E4  
T: ITMS + p NSI Full ms [150.00-2000.00]

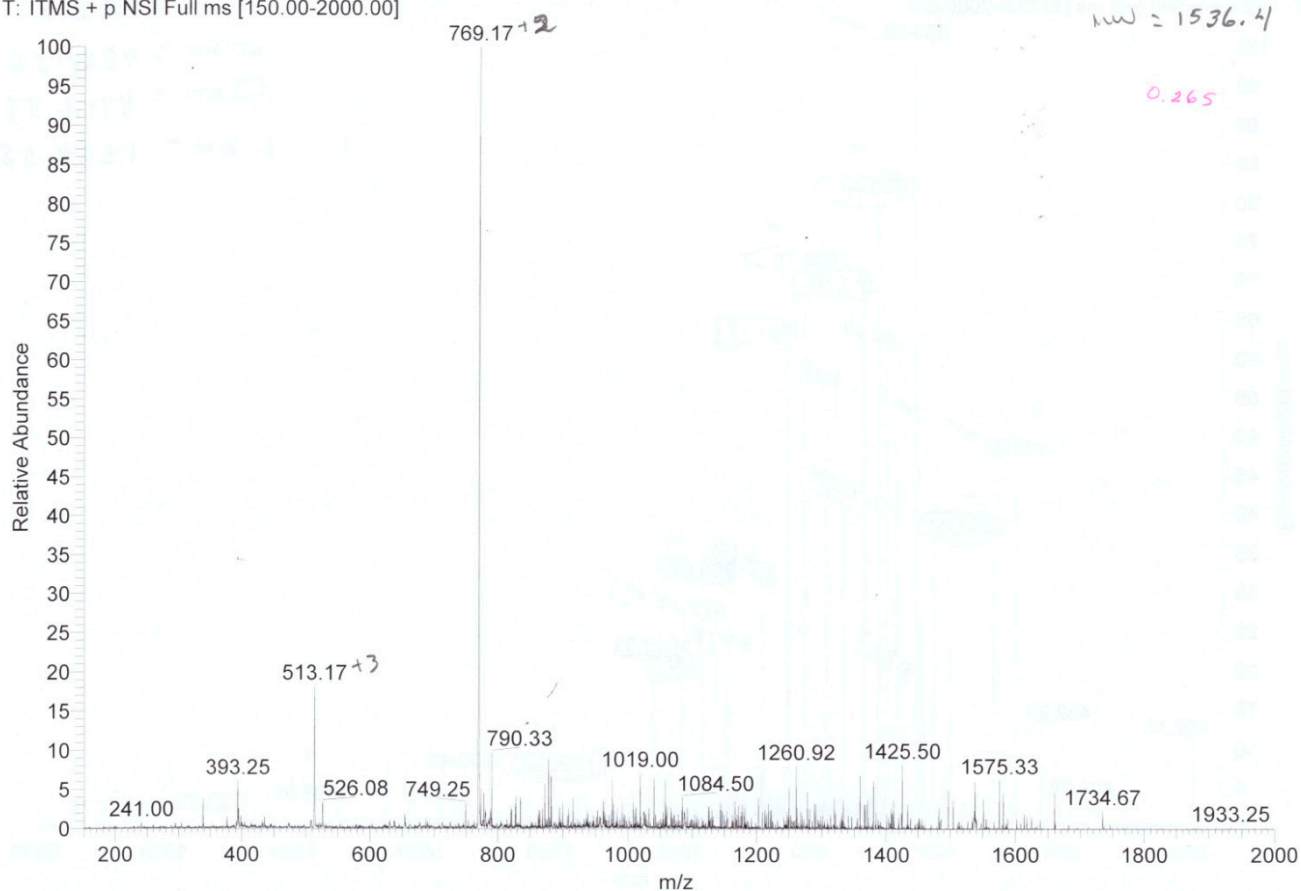

**Figure S10.** Mass spectrum fraction 59 *Chihuahuanus coahuilae*

*Chihuahuanus crassimanus*

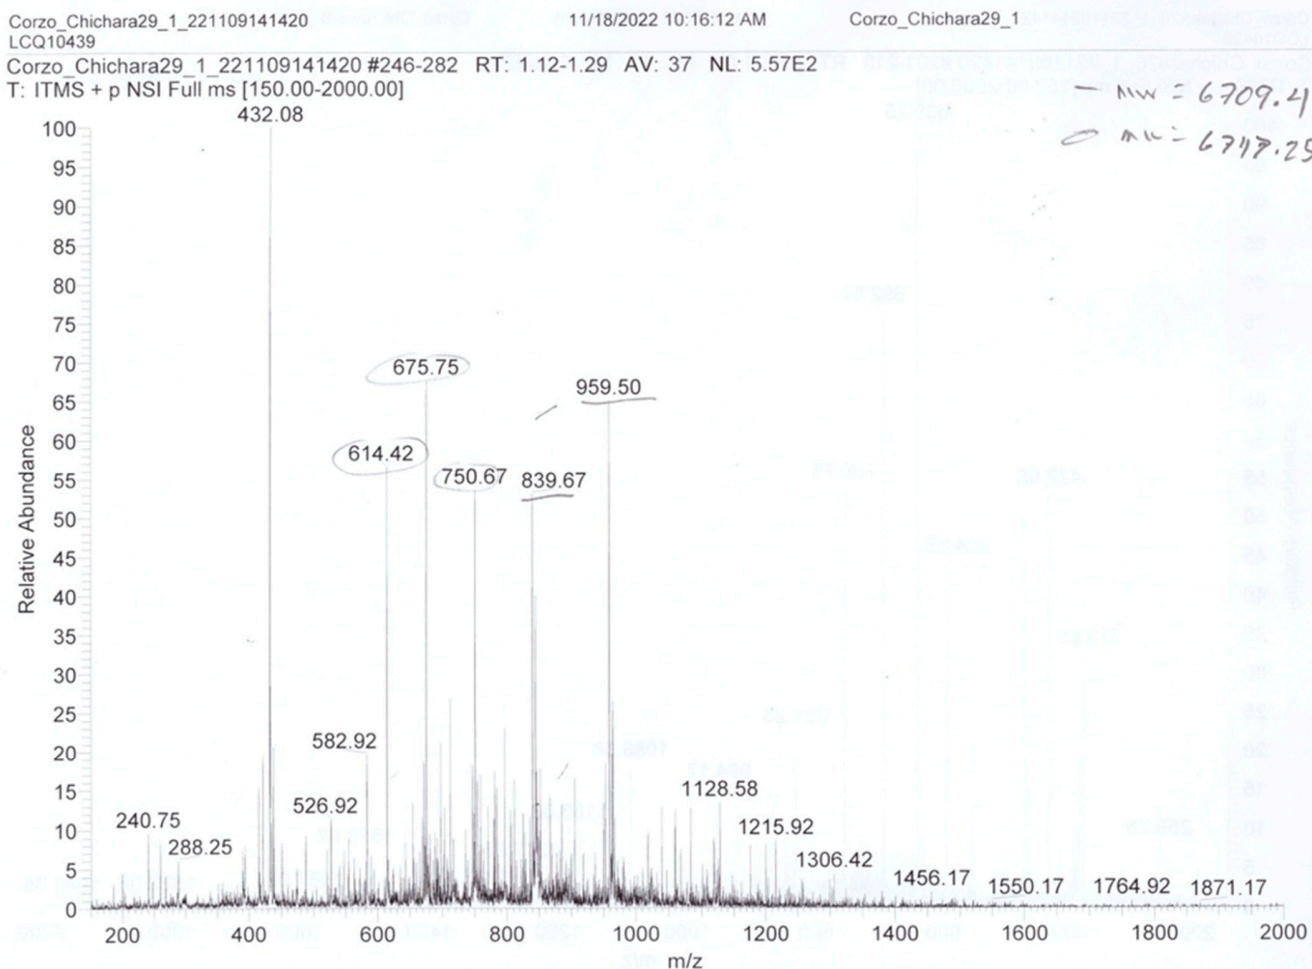

**Figure S11.** Mass spectrum fraction 29 *Chihuahuanus crassimanus*



Corzo\_Chichara30\_1\_221109141420  
LCQ10439

11/18/2022 10:36:50 AM

Corzo\_Chichara30\_1

Corzo\_Chichara30\_1\_221109141420 #210-223 RT: 0.97-1.03 AV: 14 NL: 1.85E3  
T: ITMS + p NSI Full ms [150.00-2000.00]

mw = 6643

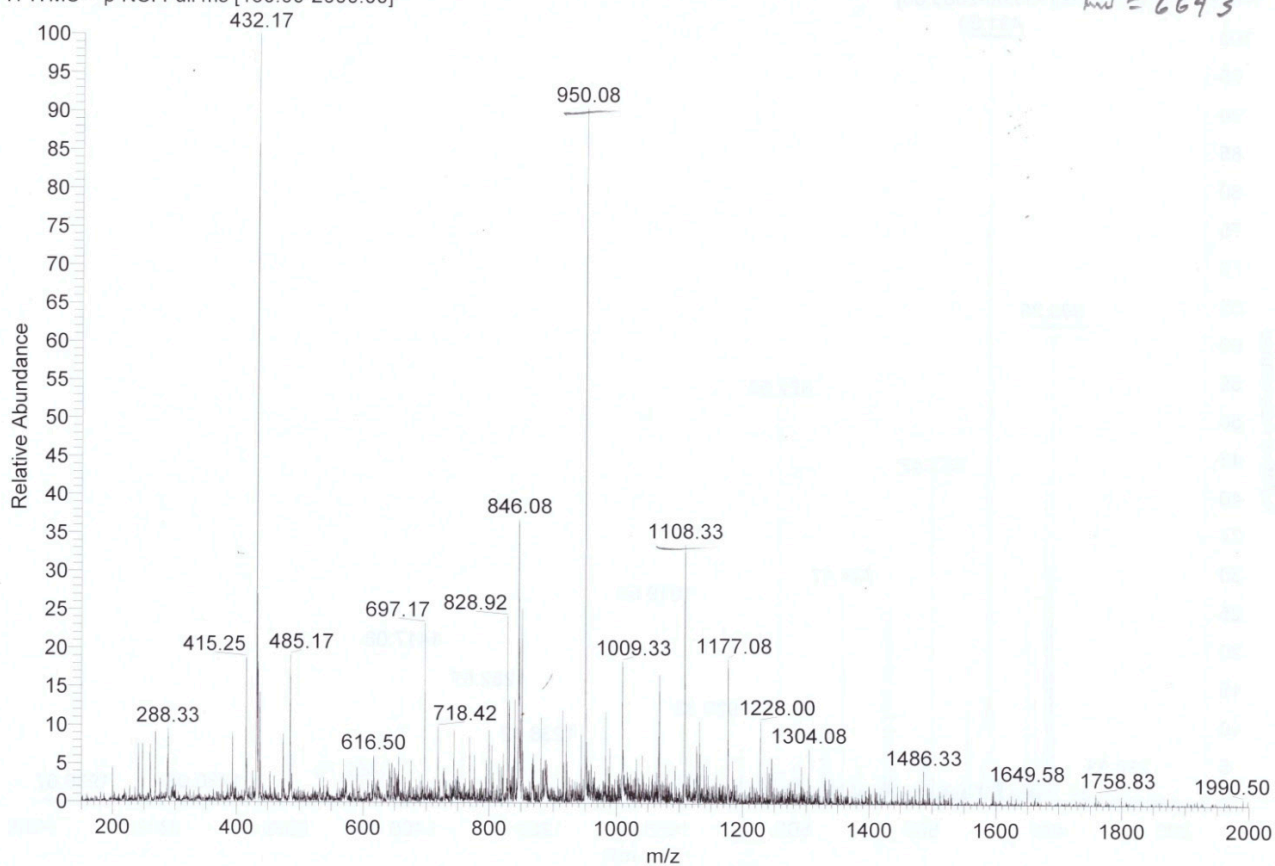

**Figure S12.** Mass spectrum fraction 30 *Chihuahuanus crassimanus*



Corzo\_Chichara36\_1\_221109141420 #162-192 RT: 0.75-0.88 AV: 31 NL: 3.38E3  
T: ITMS + p NSI Full ms [150.00-2000.00]

$m/z = 2133.34$

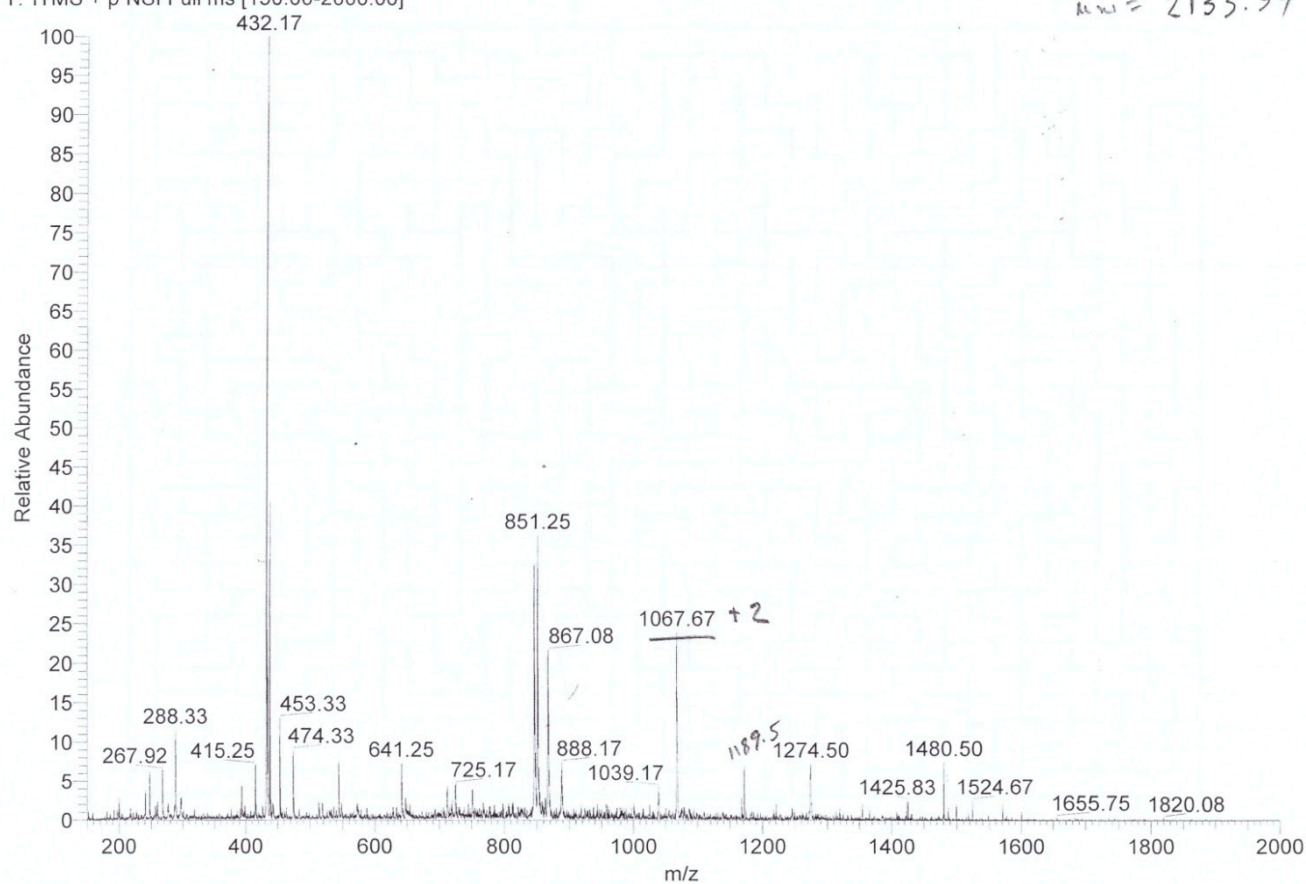

**Figure S13.** Mass spectrum fraction 36 *Chihuahuanus crassimanus*

```

C0HK83_Pandinus_imperator_KTx_2.9      VDACYEACMHMHMSDDCI EACKNPVPP----- 28
P0C182_C_noxius_KTx_1.11              -----TFIDVDCTVSKECWAPCKAAGVD-RGKCMGKKCKCYV-- 37
Q9TXD1_C_noxius_KTx_2.4                -----TIINEKCFATSQCWTPCKKAIGSL-QSKCMNGKCKCYNG- 38
P08815_C_noxius_KTx_2.1                -----TIINVKCTSPKQCSKPKELYGSSAGAKCMNGKCKCYNN- 39
P85529_Centruroides_suffusus_KTx_2.13  -----IFINVKCSSPQQCLKPCKAAGFISAGGKINGKCKCYP-- 38
O46028_C_noxius_KTx_10.1               -----AVCVYRTCDKDK-RRGYR-SGKINNACKCYPY- 32
P0DJ31_Vaejovis_mexicanus_smithi_KTx_23.1 -----AAAI SCVGSPECPPCKR-AQGCK-NGKCMNRKCKCYC- 36
P0DJ32_Vaejovis_mexicanus_smithi_KTx_23.2 -----AAAI SCVGSKECLPKCK-AQGCK-SGKCMNRKCKCYC- 35
C0HK82_Pandinus_imperator_KTx_24.1     -----VAKCSTSECGHACQ-QAGCR-NSGCRYGSCICVGC- 33
P55928_Pandinus_imperator_KTx_7.2      -----TISCTNEKQCYPHCKKETGYP-NAKCMNRKCKCFGR- 35
Q10726_Pandinus_imperator_KTx_6.1      -----LVKCRGTSDCGRPCQQQTGCP-NSKCMNRKCKCYGC- 35
P58498_Pandinus_imperator_KTx_6.4      -----IEAIRCGGSRDCYRCPQKRTGCP-NAKCMNRKCKCYGC- 38

```

Figure S14. KTxs. Sequences were obtained from Kalium database <https://kaliumdb.org/>, which is a collection of natural peptides acting on potassium channels mostly originating from the venoms of animals like scorpions, snakes, spiders and sea anemones. The alignment was made with the program Clustal Omega <https://www.ebi.ac.uk/Tools/msa/clustalo/>.

Table S2. KTxs Sequence data was obtained from Kalium database (<http://kaliumdb.org>), which is a collection of natural peptides acting on potassium channels mostly originating from the venoms of animals like scorpions, snakes, spiders, and sea anemones.

| Species                          | Toxin    | Molecular weight<br>(Da) |
|----------------------------------|----------|--------------------------|
| <i>Centruroides noxius</i>       | KTx 1.11 | 4085.97                  |
|                                  | KTx 2.1  | 4195.06                  |
|                                  | KTx 2.4  | 4183.048                 |
|                                  | KTx 10.1 | 3731.476                 |
| <i>Vaejovis mexicanus smithi</i> | KTx 23.1 | 3863.776                 |
|                                  | KTx 23.2 | 3667.602                 |
| <i>Pandinus imperator</i>        | KTx 6.1  | 3834.648                 |
|                                  | KTx 6.4  | 4180.032                 |
|                                  | KTx 7.2  | 4065.8637                |
|                                  | KTx 24.1 | 3334.7009                |
|                                  | KTx 2.9  | 3126.4445                |
| <i>Centruroides suffusus</i>     | KTx 2.13 | 4000.94                  |

|                                        |                                                                                         |
|----------------------------------------|-----------------------------------------------------------------------------------------|
| F1AWB0.1_Vejovine_Vaejovis_mexicanus   | MNAKTLFVFLIGMLV-----TEQVEAGIWSIKNLASKAHNS---DIGQSLRNKAAGAINKFVADKIGVTPSQASMTLDEIVDAMYYD |
| AFH87944.1_CT1_Vaejovis_mexicanus      | --MKTQFVILLIVAVVLLQLISHSEAFGLAMNVAKSVFGKRGRLR---NFDOLD-DTFEPE-----MSEADLKYLDLLR----     |
| AFH87945.1_CT2_Vaejovis_mexicanus      | --MKTQFVILLIVAVVLLQLIANSEAFSLTNWNAKSIKFGKRGRLR---NLDNLDODIFEPE-----MSEADLRYLDLLR----    |
| P86344_Brotheas_amazonicus             | -----IGDINSIGIQG-----                                                                   |
| P86342_Brotheas_amazonicus             | -----GFIGDINSIGIQG-----                                                                 |
| R4JJN6_Pandinus_imperator              | --MKTQFAILLIALVLFQLLSQSDAFLSTINGIKSLLGRRLN---ELDNLD-ELFDGE-----ISQADIDFLKELMS----       |
| L0GCI6_Urodacus_yaschenkoi             | --MKNQFVLLLLAIVFLQMFQSDAILSAIWSGIKSLFGKRGLE---NMOKFD-ELFDGD-----LSEADLDFLKLMLR----      |
| C5J886_Opisthacanthus_cayaporum        | --MKAQLCILLIALVLFQTFQSDAILSAIWSGIKSLFGKRGRLN---DLDDLD-ELFDGE-----ISQADVDLFLNELMR----    |
| Urodacus_yaschenkoi_Uy17               | -----ILSAIWSGIKGLL-----                                                                 |
| L0GAZ8_Urodacus_yaschenkoi             | --MKNQFAILLLAVVFLQLISQSDAIWSAIWSGIKGLLGRGLK---NADRLD-ELFDGD-----ISDADLDFLRELMLR----     |
| P0DJ02_Heterometrus_petersii           | --MKTQFAIFLITLVLQMFQSDAIFKAIWSGIKSLFGKRGLS---DLDDLD-ESFDGE-----VSQADIDFLKELMQ----       |
| P0DME9_Heterometrus_petersii           | --MKTQFAIFLITLVLQMFQSDAIFKAIWSGIKSLFGKRGLS---DLYDLD-EMFDGE-----ISQADIDFLKELMR----       |
| P0DME8_Heterometrus_petersii           | --MKTQFTVLLITLVLQMFQSDAIFKAIWSGIKSLFGKRGLS---DLSOLD-ELFDGE-----ITKADLDFLREIM----        |
| Q8MTX2_Opisthacanthus_madagascariensis | --MKTQFAILLVALVLFQMFQSDAIFGAIWSGIKSLFGRRALNNDLDDGLD-ELFDGE-----ISQADVDLFLKELMR----      |
| Q8MMJ7_Opisthacanthus_madagascariensis | --MKTQFAILLVALVLFQMFQSDAILGKIWEGIKSLFGKRGLS---DLDDLD-ELFDGE-----ISKADLDFLRELMLR----     |
| P0DME6_Heterometrus_petersii           | --MKTQFAILLITLVLQMFQSDAILGKIWEGIKSLFGKRGRLN---DLSOLD-ELFDGE-----ISEADVDLFLREIM----      |
| A0A0C4G4L1_Heterometrus_spinifer       | --MKTQFAILLITLVLQMFQSDAILGKIWEGIKSLFGKRGRLN---DLSOLD-ELFDGE-----ISKADLDFLREIM----       |
| P0DME7_Heterometrus_petersii           | --MKTQFAILLITLVLQMFQSDAILGKIWEGIKSLFGKRGRLN---DLSOLD-ELFDGE-----ISKADLDFLREIM----       |

**Figure S15. AMPs Sequences found on CAMP R3 database- No molecular weight its reported.**

Due to their wide range of functions and targets, rapid efficacy, and low potential for inducing resistance, antimicrobial peptides (AMPs) have emerged as promising candidates for new antibiotics, as highlighted by Huang et al. (2010) (Huang et al., 2010). AMPs primarily eliminate microorganisms by employing mechanisms that target their membranes and form pores, which inherently pose greater challenges for microbes to develop resistance against, as discussed by Hancock and Sahl (2006) (Hancock & Sahl, 2006). A considerable portion of the characterized scorpion venom Non-Disulfide-Bridged-Peptides (NDBPs) exhibit antimicrobial properties, thus classifying them as AMPs, as noted by Harrison et al. (2014) (Harrison et al., 2014). The precise reason for their presence in scorpion venom remains unclear. They may potentially contribute synergistically to venom activity or serve as a component of the venom gland's antimicrobial response, as suggested by Kuhn-Nentwig (2003) (Kuhn-Nentwig, 2003).

**Table S3. AMPs. Scorpion-derived compounds with antibacterial activities**

| Specie                                 | Antibacterial agent                                                               | Molecular weight | Reference                       |
|----------------------------------------|-----------------------------------------------------------------------------------|------------------|---------------------------------|
| <i>U. yaschenkoi</i>                   | Uy234                                                                             | 1986.19          | (Cesa-Luna et al., 2019)        |
|                                        | Uy17                                                                              | 1369.43          |                                 |
|                                        | Uy192                                                                             | 1459.98          |                                 |
| <i>D. melici</i>                       | Red 1,4-benzoquinone: 3,5-dimethoxy-2-(methylthio) cyclohexa-2,5-diene-1,4-dione  | 168.15           | (Carcamo-Noriega et al., 2019)  |
|                                        | Blue 1,4-benzoquinone: 5-methoxy-2,3-bis(methylthio)cyclohexa-2,5-diene-1,4-dione |                  |                                 |
| <i>Hadrurus gertschi</i>               | Hadrurin                                                                          | 4435.3           | (Torres-Larios et al., 2000)    |
| <i>Opisthacanthus madagascariensis</i> | IsCTs                                                                             | 1501.9           | (Dai et al., 2001)              |
| <i>Vaejovis mexicanus</i>              | vejovine                                                                          | 4873             | (Hernández-Aponte et al., 2011) |
| <i>Pandinus imperator</i>              | Scorpine                                                                          | 8350             | (Conde et al., 2000)            |
|                                        | Pandinins 2                                                                       | 2612.11          | (Corzo et al., 2001)            |
